# Supplementary material for: Development of an algorithm for assessing fall risk in a Japanese inpatient population
Source: Springer Nature journal article supplement (doi:10.1038/s41598-021-97483-1), 2021-09-09
Supplement: 41598_2021_97483_MOESM1_ESM.pdf [file 41598_2021_97483_MOESM1_ESM.pdf]

## **Supplementary Information**

### **Development of an algorithm for assessing fall risk in a Japanese inpatient population**

Tomoko Nakanishi<sup>1,2\*</sup>, Tokunori Ikeda<sup>3,4\*</sup>, Taishi Nakamura<sup>1,3</sup>, Yoshinori Yamanouchi<sup>1</sup>,  
Akira Chikamoto<sup>5</sup>, Koichiro Usuku<sup>1,3</sup>

#### **Author affiliations**

<sup>1</sup>Department of Medical Information Science, Graduate School of Medical Sciences, Kumamoto University, 1-1-1 Honjo, Chuou-ku, Kumamoto 860-8556, Japan

<sup>2</sup>Department of Nursing, Kumamoto University Hospital, Kumamoto, Japan

<sup>3</sup>Department of Medical Information Sciences and Administration Planning, Kumamoto University Hospital, Kumamoto, Japan

<sup>4</sup>Laboratory of Clinical Pharmacology and Therapeutics, Faculty of Pharmaceutical Sciences, Sojo University, 4-22-1, Ikeda, Nishi-ku, Kumamoto 860-8556, Japan

<sup>5</sup>Department of Medical Quality and Safety Management, Kumamoto University Hospital, Kumamoto, Japan

**\*Corresponding authors**

Tomoko Nakanishi: [t-nakanishi@kuh.kumamoto-u.ac.jp](mailto:t-nakanishi@kuh.kumamoto-u.ac.jp)

Tokunori Ikeda: [ryousei@ph.sojo-u.ac.jp](mailto:ryousei@ph.sojo-u.ac.jp)

**Supplementary Figure S1. Boxplot of predicted probabilities.**

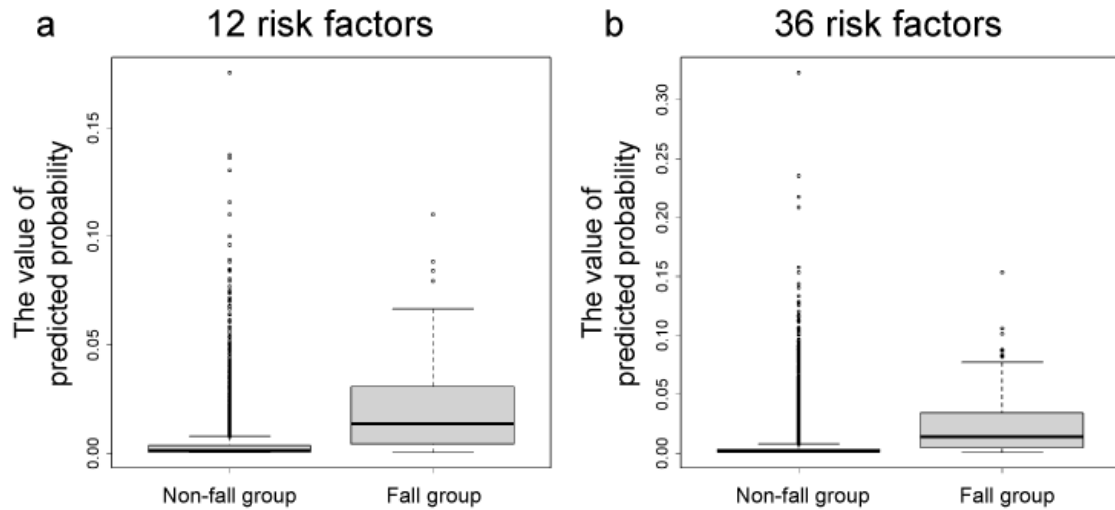

The predicted probabilities for a fall were estimated by two logistic models using 12 (a) and 36 (b) risk factors. To draw these figures, R (version 4.0.2, URL: <https://cran.r-project.org/bin/windows/base/old/4.0.2/>) was utilized.

Supplementary Table S1. Correlation coefficients between 36 risk factors.

|                                 | Presence of fall | Age   | Fall history | Syncope | Visual impairment | Auditory impairment | Paralysis | Dysesthesia | Joint contracture/deformation | Muscle weakness of the lower | Use of a walking aid | Need of transfer assistance | Stagger | Bedridden status | Presence of infusion route/tube | Impaired consciousness | Dementia | Impaired judgment/comprehension | Delirium | Memory disturbance | Use of analgesic | Use of opioid | Use of sleeping drug | Use of anti-Parkinson's agent | Use of hypotensive diuretic | Use of laxative | Chemotherapy | Fecal/Urinary incontinence | Pollakiuria | Need of infusing assistance | Use of urethral catheter | Night urination | Anemia | Hypoxemia | Orthostatic hypotension | Hypoglycemia |      |
|---------------------------------|------------------|-------|--------------|---------|-------------------|---------------------|-----------|-------------|-------------------------------|------------------------------|----------------------|-----------------------------|---------|------------------|---------------------------------|------------------------|----------|---------------------------------|----------|--------------------|------------------|---------------|----------------------|-------------------------------|-----------------------------|-----------------|--------------|----------------------------|-------------|-----------------------------|--------------------------|-----------------|--------|-----------|-------------------------|--------------|------|
| Presence of a fall              | 1                | 0.15  | 0.39         | 0.1     | 0.04              | 0.13                | 0.18      | 0.04        | 0.15                          | 0.37                         | 0.31                 | 0.32                        | 0.29    | 0.07             | 0.11                            | 0.2                    | 0.3      | 0.35                            | 0.35     | 0.28               | 0.08             | 0.1           | 0.2                  | 0.24                          | 0.09                        | 0.13            | 0            | 0.29                       | 0.09        | 0.31                        | -0.01                    | 0.12            | 0.12   | 0.16      | 0.05                    | 0.01         | 0.04 |
| Age                             | 0.15             | 1     | 0.3          | -0.06   | 0.15              | 0.5                 | 0.02      | 0.11        | 0.03                          | 0.45                         | 0.3                  | 0.21                        | 0.2     | 0.02             | 0.01                            | 0.25                   | 0.21     | 0.27                            | 0.19     | 0.33               | -0.04            | -0.03         | 0.18                 | 0.26                          | 0.32                        | 0.13            | -0.01        | 0.24                       | 0.19        | 0.18                        | 0.05                     | 0.24            | 0.02   | 0.1       | -0.07                   | -0.05        |      |
| Fall history                    | 0.39             | 0.3   | 1            | 0.33    | 0.2               | 0.26                | 0.35      | 0.25        | 0.19                          | 0.52                         | 0.42                 | 0.38                        | 0.48    | 0.1              | -0.03                           | 0.28                   | 0.33     | 0.37                            | 0.32     | 0.38               | 0.07             | -0.05         | 0.2                  | 0.32                          | 0.14                        | 0.21            | -0.06        | 0.38                       | 0.2         | 0.31                        | 0.01                     | 0.14            | 0.14   | 0.04      | 0.27                    | 0.19         |      |
| Syncope                         | 0.1              | -0.06 | 0.33         | 1       | 0.04              | 0.04                | 0.07      | 0.09        | 0.07                          | 0.13                         | 0.09                 | 0.13                        | 0.22    | 0.08             | 0.02                            | 0.16                   | 0.18     | 0.19                            | 0.21     | 0.17               | -0.01            | -0.02         | 0.1                  | -0.03                         | 0.02                        | 0.09            | 0.02         | 0.13                       | 0.09        | 0.14                        | 0.03                     | 0.01            | 0.11   | 0.15      | 0.44                    | 0.13         |      |
| Visual impairment               | 0.04             | 0.15  | 0.2          | 0.04    | 1                 | 0.32                | 0.11      | 0.13        | 0.21                          | 0.15                         | 0.23                 | 0.12                        | 0.13    | -0.06            | -0.04                           | 0.02                   | 0.07     | 0.09                            | 0.07     | 0.12               | -0.11            | -0.1          | 0.06                 | 0.07                          | 0.08                        | 0.03            | -0.12        | 0.05                       | 0.05        | 0.03                        | -0.1                     | 0.08            | 0.01   | 0.02      | 0.09                    | 0.14         |      |
| Auditory impairment             | 0.13             | 0.5   | 0.26         | 0.04    | 0.32              | 1                   | 0.08      | 0.11        | 0.1                           | 0.35                         | 0.23                 | 0.17                        | 0.23    | 0.04             | -0.01                           | 0.12                   | 0.15     | 0.21                            | 0.17     | 0.25               | 0                | -0.04         | 0.05                 | 0.1                           | 0.13                        | 0.08            | -0.08        | 0.18                       | 0.18        | 0.15                        | 0.03                     | 0.14            | 0.06   | 0.09      | 0.04                    | -0.04        |      |
| Paralysis                       | 0.18             | 0.02  | 0.35         | 0.07    | 0.11              | 0.08                | 1         | 0.15        | 0.55                          | 0.47                         | 0.4                  | 0.5                         | 0.39    | 0.39             | 0.09                            | 0.39                   | 0.43     | 0.43                            | 0.2      | 0.39               | 0.01             | 0             | 0.07                 | 0.14                          | 0.16                        | 0.23            | -0.05        | 0.52                       | 0.17        | 0.46                        | 0.24                     | -0.22           | 0.09   | -0.03     | 0.09                    | 0.07         |      |
| Dysesthesia                     | 0.04             | 0.11  | 0.25         | 0.09    | 0.13              | 0.11                | 0.15      | 1           | 0.12                          | 0.33                         | 0.24                 | 0.13                        | 0.22    | 0                | -0.04                           | -0.09                  | -0.07    | -0.05                           | -0.05    | -0.07              | 0.19             | 0.12          | 0.18                 | 0.04                          | 0.06                        | 0.22            | 0.15         | 0.03                       | 0.02        | 0.09                        | -0.05                    | 0.08            | 0.08   | 0.03      | 0.12                    | 0.24         |      |
| Joint contracture/deformation   | 0.15             | 0.03  | 0.19         | 0.07    | 0.21              | 0.1                 | 0.55      | 0.12        | 1                             | 0.5                          | 0.22                 | 0.51                        | 0.25    | 0.48             | 0.16                            | 0.48                   | 0.5      | 0.46                            | 0.38     | 0.37               | -0.03            | 0.1           | 0.1                  | 0.28                          | 0.11                        | 0.3             | -0.14        | 0.52                       | 0.13        | 0.47                        | 0.26                     | -0.29           | 0.23   | 0.3       | 0.25                    | 0.11         |      |
| Muscle weakness of the lower    | 0.37             | 0.45  | 0.52         | 0.13    | 0.15              | 0.35                | 0.47      | 0.33        | 0.5                           | 1                            | 0.62                 | 0.52                        | 0.62    | 0.24             | 0.15                            | 0.43                   | 0.48     | 0.51                            | 0.38     | 0.45               | 0.17             | 0.19          | 0.28                 | 0.28                          | 0.24                        | 0.3             | 0.01         | 0.54                       | 0.23        | 0.5                         | 0.16                     | 0.09            | 0.33   | 0.37      | 0.29                    | 0.17         |      |
| Use of a walking aid            | 0.31             | 0.3   | 0.42         | 0.09    | 0.23              | 0.23                | 0.4       | 0.24        | 0.22                          | 0.62                         | 1                    | 0.62                        | 0.55    | 0.04             | 0.18                            | 0.15                   | 0.25     | 0.3                             | 0.17     | 0.26               | 0.22             | 0.13          | 0.18                 | 0.26                          | 0.18                        | 0.19            | -0.08        | 0.37                       | 0.18        | 0.48                        | 0                        | 0.1             | 0.2    | 0.28      | 0.2                     | 0.12         |      |
| Need of transfer assistance     | 0.32             | 0.21  | 0.35         | 0.13    | 0.12              | 0.17                | 0.5       | 0.13        | 0.51                          | 0.52                         | 0.62                 | 1                           | 0.56    | 0.77             | 0.63                            | 0.57                   | 0.55     | 0.56                            | 0.45     | 0.41               | 0.27             | 0.39          | 0.1                  | 0.24                          | 0.14                        | 0.14            | -0.19        | 0.57                       | 0.13        | 0.9                         | 0.68                     | -0.22           | 0.27   | 0.49      | 0.2                     | 0.06         |      |
| Stagger                         | 0.39             | 0.2   | 0.48         | 0.22    | 0.13              | 0.23                | 0.39      | 0.22        | 0.25                          | 0.62                         | 0.55                 | 0.56                        | 1       | 0.26             | 0.17                            | 0.39                   | 0.47     | 0.51                            | 0.38     | 0.4                | 0.12             | 0.16          | 0.17                 | 0.38                          | 0.14                        | 0.21            | -0.04        | 0.48                       | 0.25        | 0.56                        | 0.17                     | 0.07            | 0.29   | 0.26      | 0.36                    | 0.12         |      |
| Bedridden status                | 0.07             | 0.02  | 0.1          | 0.08    | -0.06             | 0.04                | 0.39      | 0           | 0.48                          | 0.24                         | 0.04                 | 0.77                        | 0.26    | 1                | 0.71                            | 0.59                   | 0.51     | 0.47                            | 0.32     | 0.34               | 0.25             | 0.42          | -0.03                | 0.08                          | 0.02                        | 0.04            | -0.18        | 0.47                       | -0.02       | 0.78                        | 0.88                     | -0.44           | 0.2    | 0.4       | 0.08                    | -0.06        |      |
| Presence of infusion route/tube | 0.11             | 0.01  | -0.03        | 0.02    | -0.04             | -0.01               | 0.09      | -0.04       | 0.16                          | 0.15                         | 0.18                 | 0.63                        | 0.17    | 0.71             | 1                               | 0.29                   | 0.23     | 0.22                            | 0.09     | 0.06               | 0.19             | 0.42          | 0.01                 | -0.09                         | -0.02                       | 0.03            | 0.15         | 0.18                       | -0.05       | 0.55                        | 0.76                     | -0.17           | 0.27   | 0.46      | 0.05                    | -0.07        |      |
| Impaired consciousness          | 0.2              | 0.25  | 0.28         | 0.16    | 0.02              | 0.12                | 0.39      | -0.09       | 0.48                          | 0.43                         | 0.15                 | 0.57                        | 0.39    | 0.59             | 0.29                            | 1                      | 0.84     | 0.84                            | 0.81     | 0.76               | 0.02             | 0.16          | 0.1                  | 0.23                          | 0.05                        | 0.1             | -0.11        | 0.66                       | 0.12        | 0.62                        | 0.46                     | -0.3            | 0.2    | 0.38      | 0.13                    | -0.01        |      |
| Dementia                        | 0.3              | 0.21  | 0.33         | 0.18    | 0.07              | 0.15                | 0.43      | -0.07       | 0.5                           | 0.48                         | 0.25                 | 0.55                        | 0.47    | 0.51             | 0.23                            | 0.84                   | 1        | 0.99                            | 0.75     | 0.82               | 0.04             | 0.18          | 0.19                 | 0.28                          | 0.06                        | 0.13            | -0.05        | 0.66                       | 0.14        | 0.61                        | 0.37                     | -0.2            | 0.23   | 0.32      | 0.14                    | 0            |      |
| Impaired judgment/comprehension | 0.35             | 0.27  | 0.37         | 0.19    | 0.09              | 0.21                | 0.43      | -0.05       | 0.46                          | 0.51                         | 0.3                  | 0.56                        | 0.51    | 0.47             | 0.22                            | 0.84                   | 0.99     | 1                               | 0.77     | 0.86               | 0.04             | 0.17          | 0.2                  | 0.32                          | 0.09                        | 0.15            | -0.03        | 0.67                       | 0.18        | 0.6                         | 0.33                     | -0.14           | 0.22   | 0.3       | 0.14                    | -0.01        |      |
| Delirium                        | 0.35             | 0.19  | 0.32         | 0.21    | 0.07              | 0.17                | 0.2       | -0.05       | 0.38                          | 0.38                         | 0.17                 | 0.45                        | 0.38    | 0.32             | 0.09                            | 0.81                   | 0.75     | 0.77                            | 1        | 0.67               | 0.05             | 0.09          | 0.27                 | 0.29                          | -0.05                       | 0.14            | -0.06        | 0.55                       | 0.22        | 0.48                        | 0.19                     | -0.08           | 0.14   | 0.25      | 0.24                    | 0.11         |      |
| Memory disturbance              | 0.28             | 0.33  | 0.38         | 0.17    | 0.12              | 0.25                | 0.39      | -0.07       | 0.37                          | 0.45                         | 0.26                 | 0.41                        | 0.4     | 0.34             | 0.06                            | 0.76                   | 0.82     | 0.86                            | 0.67     | 1                  | -0.06            | -0.03         | 0.15                 | 0.27                          | 0.08                        | 0.14            | -0.09        | 0.6                        | 0.2         | 0.43                        | 0.16                     | -0.05           | 0.07   | 0.25      | -0.06                   | -0.02        |      |
| Use of analgesic                | 0.08             | -0.04 | 0.07         | -0.01   | -0.11             | 0                   | 0.01      | 0.19        | -0.03                         | 0.17                         | 0.22                 | 0.27                        | 0.12    | 0.25             | 0.19                            | 0.02                   | 0.04     | 0.04                            | 0.05     | -0.06              | 1                | 0.54          | 0.14                 | -0.02                         | -0.03                       | 0.08            | 0            | 0.04                       | -0.01       | 0.28                        | 0.27                     | -0.15           | 0.13   | 0.09      | 0.05                    | 0.02         |      |
| Use of opioid                   | 0.1              | -0.03 | -0.05        | -0.02   | -0.1              | -0.04               | 0         | 0.12        | 0.1                           | 0.19                         | 0.13                 | 0.39                        | 0.16    | 0.42             | 0.16                            | 0.18                   | 0.17     | 0.09                            | -0.03    | 0.54               | 1                | 0.04          | -0.11                | -0.15                         | 0.19                        | 0.37            | 0.06         | -0.1                       | 0.38        | 0.43                        | -0.13                    | 0.27            | 0.19   | 0.08      | -0.06                   |              |      |
| Use of sleeping drug            | 0.2              | 0.18  | 0.2          | 0.1     | 0.06              | 0.05                | 0.07      | 0.18        | 0.1                           | 0.28                         | 0.18                 | 0.1                         | 0.17    | -0.03            | 0.01                            | 0.1                    | 0.19     | 0.2                             | 0.27     | 0.15               | 0.14             | 0.04          | 1                    | 0.23                          | 0.11                        | 0.27            | 0.06         | 0.1                        | 0.06        | 0.07                        | -0.06                    | 0.11            | 0.13   | 0.2       | 0.12                    | -0.07        |      |
| Use of anti-Parkinson's agent   | 0.24             | 0.26  | 0.32         | -0.03   | 0.07              | 0.1                 | 0.14      | 0.04        | 0.28                          | 0.28                         | 0.26                 | 0.24                        | 0.38    | 0.08             | -0.09                           | 0.23                   | 0.28     | 0.32                            | 0.29     | 0.27               | -0.02            | -0.11         | 0.23                 | 1                             | -0.03                       | 0.19            | -0.24        | 0.29                       | 0.29        | 0.24                        | 0.05                     | 0.06            | -0.14  | -0.05     | 0.1                     | -0.52        |      |
| Use of hypotensive diuretic     | 0.09             | 0.32  | 0.14         | 0.02    | 0.08              | 0.13                | 0.16      | 0.06        | 0.11                          | 0.24                         | 0.18                 | 0.14                        | 0.14    | 0.02             | -0.02                           | 0.05                   | 0.06     | 0.09                            | -0.05    | 0.08               | -0.03            | -0.15         | 0.11                 | -0.03                         | 1                           | 0.08            | -0.12        | 0.09                       | 0.14        | 0.11                        | 0.04                     | 0.1             | 0.05   | 0.27      | -0.08                   | 0.1          |      |
| Use of laxative                 | 0.13             | 0.13  | 0.21         | 0.09    | 0.03              | 0.08                | 0.23      | 0.22        | 0.3                           | 0.3                          | 0.19                 | 0.14                        | 0.21    | 0.04             | 0.03                            | 0.1                    | 0.13     | 0.15                            | 0.14     | 0.14               | 0.08             | 0.19          | 0.27                 | 0.19                          | 0.08                        | 1               | 0.27         | 0.24                       | 0.13        | 0.12                        | -0.02                    | 0.1             | 0.16   | 0.15      | 0.18                    | 0.06         |      |
| Chemotherapy                    | 0                | -0.01 | -0.06        | 0.02    | -0.12             | -0.08               | -0.05     | 0.15        | -0.14                         | 0.01                         | -0.08                | -0.19                       | -0.04   | -0.18            | 0.15                            | -0.11                  | -0.05    | -0.03                           | -0.06    | -0.09              | 0                | 0.37          | 0.06                 | -0.24                         | -0.12                       | 0.27            | 1            | -0.08                      | -0.06       | -0.21                       | -0.18                    | 0.23            | 0.23   | -0.01     | 0.11                    | -0.13        |      |
| Fecal/Urinary incontinence      | 0.29             | 0.24  | 0.38         | 0.13    | 0.05              | 0.18                | 0.52      | 0.03        | 0.52                          | 0.54                         | 0.37                 | 0.57                        | 0.48    | 0.47             | 0.18                            | 0.66                   | 0.66     | 0.67                            | 0.55     | 0.6                | 0.04             | 0.06          | 0.1                  | 0.29                          | 0.09                        | 0.24            | -0.08        | 1                          | 0.29        | 0.61                        | 0.31                     | -0.19           | 0.24   | 0.28      | 0.16                    | 0.09         |      |
| Pollakiuria                     | 0.09             | 0.19  | 0.2          | 0.09    | 0.05              | 0.18                | 0.17      | 0.02        | 0.13                          | 0.23                         | 0.18                 | 0.13                        | 0.25    | -0.02            | -0.05                           | 0.12                   | 0.14     | 0.18                            | 0.22     | 0.2                | -0.01            | -0.1          | 0.06                 | 0.29                          | 0.14                        | 0.13            | -0.06        | 0.29                       | 1           | 0.16                        | -0.02                    | 0.28            | 0.05   | -0.03     | 0.11                    | 0.05         |      |
| Need of infusing assistance     | 0.31             | 0.18  | 0.31         | 0.14    | 0.03              | 0.15                | 0.46      | 0.09        | 0.47                          | 0.5                          | 0.48                 | 0.9                         | 0.56    | 0.78             | 0.55                            | 0.62                   | 0.61     | 0.6                             | 0.48     | 0.43               | 0.28             | 0.38          | 0.07                 | 0.24                          | 0.11                        | 0.12            | -0.21        | 0.61                       | 0.16        | 1                           | 0.7                      | -0.31           | 0.3    | 0.47      | 0.22                    | 0.03         |      |
| Use of urethral catheter        | -0.01            | 0.05  | 0.01         | 0.03    | -0.1              | 0.03                | 0.24      | -0.05       | 0.26                          | 0.16                         | 0                    | 0.68                        | 0.17    | 0.88             | 0.76                            | 0.46                   | 0.37     | 0.33                            | 0.19     | 0.16               | 0.27             | 0.43          | -0.06                | 0.05                          | 0.04                        | -0.02           | -0.18        | 0.31                       | -0.02       | 0.7                         | 1                        | -0.45           | 0.17   | 0.32      | 0                       | -0.14        |      |
| Night urination                 | 0.12             | 0.24  | 0.14         | 0.01    | 0.08              | 0.14                | -0.22     | 0.08        | -0.29                         | 0.09                         | 0.1                  | -0.22                       | 0.07    | -0.44            | -0.17                           | -0.3                   | -0.2     | -0.14                           | -0.08    | -0.05              | -0.15            | -0.13         | 0.11                 | 0.06                          | 0.1                         | 0.1             | 0.23         | -0.19                      | 0.28        | -0.31                       | -0.45                    | 1               | -0.01  | -0.1      | 0.05                    | 0.15         |      |
| Anemia                          | 0.16             | 0.02  | 0.14         | 0.11    | 0.01              | 0.06                | 0.09      | 0.08        | 0.23                          | 0                            |                      |                             |         |                  |                                 |                        |          |                                 |          |                    |                  |               |                      |                               |                             |                 |              |                            |             |                             |                          |                 |        |           |                         |              |      |

**Supplementary Table S2. Characteristics of patients with fall and non-fall group in validation dataset.**

|                                                     | <b>Non-fall (n=57,695)</b> | <b>Fall (n=234)</b> | <b>p-Value</b> |
|-----------------------------------------------------|----------------------------|---------------------|----------------|
| Age(year), median, IQR                              | 67.0 (55.0, 75.0)          | 71.0 (63.0, 76.0)   | <0.001         |
| Male, <i>n</i> (%)                                  | 29433 (51.0)               | 127 (54.3)          | 0.33           |
| Fall history, <i>n</i> (%)                          | 16095 (27.9)               | 155 (66.2)          | <0.001         |
| Syncope, <i>n</i> (%)                               | 4415 (7.7)                 | 40 (17.1)           | <0.001         |
| Visual impairment, <i>n</i> (%)                     | 16572 (28.7)               | 84 (35.9)           | 0.02           |
| Auditory impairment, <i>n</i> (%)                   | 7189 (12.5)                | 39 (16.7)           | 0.06           |
| Paralysis, <i>n</i> (%)                             | 2644 (4.8)                 | 26 (11.1)           | <0.001         |
| Dysesthesia, <i>n</i> (%)                           | 12165 (21.1)               | 68 (29.1)           | 0.004          |
| Joint contracture/deformation, <i>n</i> (%)         | 577 (1.0)                  | 7 (3.0)             | 0.01           |
| Muscle weakness of the lower limbs, <i>n</i> (%)    | 27937 (48.4)               | 198 (84.6)          | <0.001         |
| Use of a walking aid, <i>n</i> (%)                  | 16728 (29.0)               | 136 (58.1)          | <0.001         |
| Need of transfer assistance, <i>n</i> (%)           | 21930 (38.0)               | 165 (70.5)          | <0.001         |
| Stagger, <i>n</i> (%)                               | 11941 (20.7)               | 143 (61.1)          | <0.001         |
| Bedridden status, <i>n</i> (%)                      | 8263 (14.3)                | 41 (17.5)           | 0.16           |
| Presence of infusion route/tube, <i>n</i> (%)       | 26971 (46.7)               | 134 (57.3)          | 0.002          |
| Impaired consciousness, <i>n</i> (%)                | 3089 (5.4)                 | 47 (20.1)           | <0.001         |
| Dementia, <i>n</i> (%)                              | 5167 (9.0)                 | 83 (35.5)           | <0.001         |
| Impaired judgment/comprehension, <i>n</i> (%)       | 7381(12.8)                 | 113 (48.3)          | <0.001         |
| Delirium, <i>n</i> (%)                              | 835 (1.4)                  | 22 (9.4)            | <0.001         |
| Memory disturbance, <i>n</i> (%)                    | 3518 (6.1)                 | 42 (17.9)           | <0.001         |
| Use of analgesic, <i>n</i> (%)                      | 18035 (31.3)               | 100 (42.7)          | <0.001         |
| Use of opioid, <i>n</i> (%)                         | 3519 (6.1)                 | 32 (13.7)           | <0.001         |
| Use of sleeping drug, <i>n</i> (%)                  | 12883 (22.3)               | 95 (40.9)           | <0.001         |
| Use of anti-Parkinson's disease agent, <i>n</i> (%) | 282 (0.5)                  | 2 (0.9)             | 0.32           |
| Use of hypotensive diuretic, <i>n</i> (%)           | 10703 (18.6)               | 61 (26.1)           | 0.005          |
| Use of laxative, <i>n</i> (%)                       | 14565 (25.3)               | 99 (42.3)           | <0.001         |
| Chemotherapy, <i>n</i> (%)                          | 8979 (15.6)                | 47 (20.1)           | 0.07           |
| Fecal/Urinary incontinence, <i>n</i> (%)            | 4263 (7.4)                 | 55 (23.5)           | <0.001         |
| Pollakiuria, <i>n</i> (%)                           | 3469 (6.0)                 | 23 (9.8)            | 0.02           |
| Need of toileting assistance, <i>n</i> (%)          | 14270 (24.7)               | 126 (53.8)          | <0.001         |
| Use of urethral catheter, <i>n</i> (%)              | 8977 (15.6)                | 27 (11.5)           | 0.1            |
| Night urination, <i>n</i> (%)                       | 40780 (70.7)               | 186 (79.5)          | 0.003          |
| Anemia ( $\leq$ Hb 9mg/dl), <i>n</i> (%)            | 3950 (6.8)                 | 29 (12.4)           | 0.003          |
| Hypoxemia, <i>n</i> (%)                             | 1476 (2.6)                 | 9 (3.8)             | 0.21           |
| Orthostatic hypotension, <i>n</i> (%)               | 927 (1.6)                  | 16 (6.8)            | <0.001         |
| Hypoglycemia, <i>n</i> (%)                          | 677 (1.2)                  | 8 (3.4)             | 0.007          |

Abbreviations: IQR = interquartile range.
